# Supplementary material for: Highly stable localized surface plasmon resonance of Cu nanoparticles obtained via oxygen plasma irradiation
Source: Royal Society of Chemistry journal article supplement (doi:10.1039/d3nr06277e), 2024-01-01
Supplement: d3nr06277e1.pdf [file d3nr06277e1.pdf]

## Highly Stable localized surface plasmon resonance of Cu nanoparticles obtained via oxygen plasma irradiation

Yingcui Fang,<sup>a\*</sup> Bin Xu,<sup>a</sup> Shuai Wang,<sup>a</sup> Hongjun Liu,<sup>a</sup> Jie Wang<sup>a</sup> and Mengting Si<sup>b\*</sup>

<sup>a</sup>*Department of Vacuum Science and Technology, Hefei University of Technology, Hefei, 230009, China*

<sup>b</sup>*School of Physics, Peking University, Beijing 100083, China*

simengting@pku.edu.cn, ycfang@hfut.edu.cn

### 1. Fig. S1. The sketch showing the structures of Cu, Cu<sub>2</sub>O and CuO.

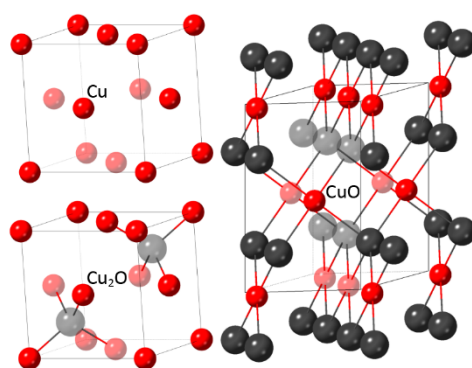

Fig. S1

### 2. Fig. S2. The TEM images of CuNPs before (a) and after (b) OPI for 2 s. Fig. S2 (c) and (d) are the amplified images of the selected areas in (a) and (b), respectively. In both figures, nanoparticles are uniformly distributed on substrates. After OPI for 2 s (Fig. S2d), a notable feature is that nearly all the nanoparticles are covered by a thin shell.

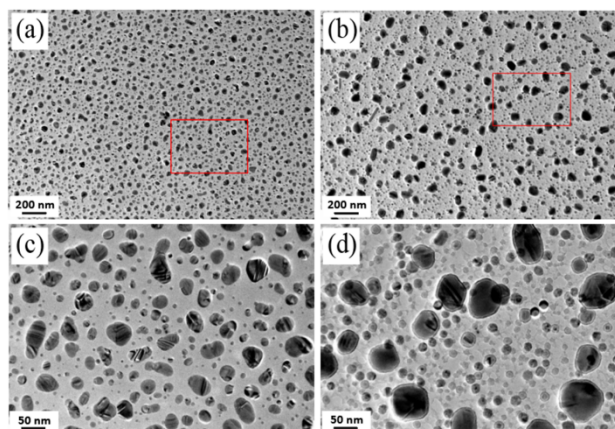

Fig. S2

3. **Tables S1 and S2 related to Fig. 2c, d in the main text.** Since the errors between the measured and the ones recorded in PDF cards # 04-0836 of Cu, # 45-0937 of CuO, are less than 5%, according to ref (J. Am. Chem. Soc. 130 (2008) 6949-6951), the attribution in the main text is reasonable.

Table S1. The measured d-spacing values, the standard values, and the corresponding errors of the CuNPs before OPI (Fig. 2c).

| Measured d/Å | PDF# d/Å | Faces    | Error |
|--------------|----------|----------|-------|
| 2.0226       | 2.0880   | Cu (111) | 3.1%  |
| 2.0622       | 2.0880   | Cu (111) | 1.2%  |
| 2.0796       | 2.0880   | Cu (111) | 0.4%  |
| 1.7553       | 1.8080   | Cu (200) | 2.9%  |
| 1.8003       | 1.8080   | Cu (200) | 0.4%  |

Table S2. The measured d-spacing values, the standard values, and the corresponding errors of the CuNPs after OPI for 2 s (Fig. 2d).

| Measured d/Å | PDF# d/Å | Faces     | Error |
|--------------|----------|-----------|-------|
| 2.0651       | 2.0880   | Cu (111)  | 1.1%  |
| 2.0670       | 2.0880   | Cu (111)  | 1.0%  |
| 2.3094       | 2.3100   | CuO (200) | 0.00% |
| 2.3158       | 2.3230   | CuO (111) | 0.03% |

4. **Fig. S3. The Diffraction rings of CuNPs before (a) and after (b) OPI for 2 s.**

The diameters of the diffraction rings are measured and indicated. According to PDF cards # 04-0836 of Cu and # 45-0937 of CuO, before OPI, the rings with  $d=2.0818$ ,  $1.8048$ ,  $1.2757$ ,  $1.0818$ , and  $0.8098$  are corresponding to Cu (111), Cu (200), Cu (220), Cu (311), and Cu (420), respectively. After OPI for 2 s, a new ring with a  $d=2.3137$  Å appears. It is corresponding to CuO(111).

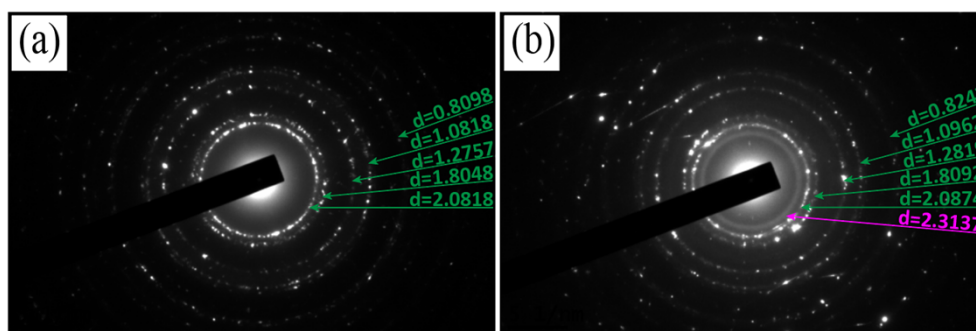

Fig. S3

5. Table S3. The spectral fitting data of XPS of Cu<sub>2</sub>p<sub>1/2</sub>

| Table S3 |         |          |                  |
|----------|---------|----------|------------------|
|          | BE(eV)  | FWHM(eV) | Component        |
| OPI-0s   | 932.7eV | 1.15     | Cu               |
|          | 932.7eV | 1.15     | Cu               |
|          | 934.2eV | 3.00     | CuO              |
| OPI-2s   | 941.4eV | 2.50     |                  |
|          | 942.5eV | 3.00     | Cu <sup>2+</sup> |
|          | 944.3eV | 1.80     |                  |

6. Fig. S4. The Cu<sub>2</sub>p spectra of different Cu(II) compounds from Avantage.

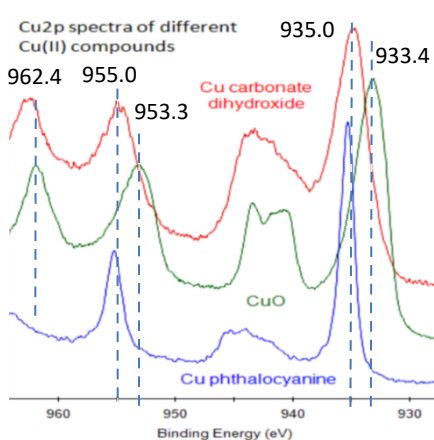

Fig. S4

**7. Fig. S5. The spectrum and the line scan result by EDS.**

Fig. S5(a) quantitatively shows the atomic contents of Cu and O. Figs. S5(b) and (c) are the element distribution of Cu and O along the line shown in Fig. 4a.

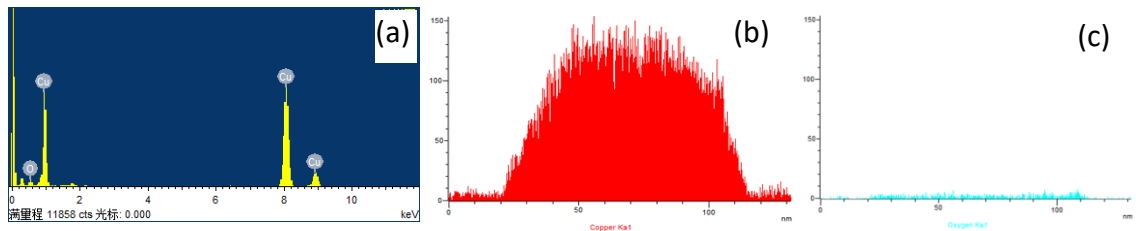

Fig. S5
